# Supplementary material for: Visualising mouse neuroanatomy and function by metal distribution using laser ablation-inductively coupled plasma-mass spectrometry imaging
Source: PubMed Central journal article supplement (PMC5669312; doi:10.1039/c5sc02231b), 2015-07-27
Supplement: SC-006-C5SC02231B-s001.pdf [file SC-006-C5SC02231B-s001.pdf]

**Supplementary Information for:**

**Visualizing mouse neuroanatomy and function by metal distribution using laser ablation-inductively coupled plasma-mass spectrometry imaging**

*Bence Paul<sup>1,2†</sup>, Dominic J. Hare<sup>2,3,4†\*</sup>, David P. Bishop<sup>3</sup>, Chad Paton<sup>5</sup>, Van Tran Nguyen<sup>3</sup>, Nerida Cole<sup>3</sup>, Megan M. Niedwiecki<sup>4</sup>, Erica Andreozzi<sup>2</sup>, Angela Vais<sup>2</sup>, Jessica L. Billings<sup>2</sup>, Lisa Bray<sup>2</sup>, Ashley I. Bush<sup>2</sup>, Gawain McColl<sup>2</sup>, Blaine R. Roberts<sup>2</sup>, Paul A. Adlard<sup>2</sup>, David I. Finkelstein<sup>2</sup>, John Hellstrom<sup>1</sup>, Janet M. Hergt<sup>1</sup>, Jon D. Woodhead<sup>1</sup> & Philip A. Doble<sup>3\*</sup>*

<sup>1</sup> *School of Earth Sciences, The University of Melbourne, Parkville, Victoria, 3052, Australia.*

<sup>2</sup> *The Florey Institute of Neuroscience and Mental Health, The University of Melbourne, Parkville, 3052, Victoria, Australia.*

<sup>3</sup> *Elemental Bio-imaging Facility, University of Technology Sydney, Broadway, 2007, New South Wales, Australia.*

<sup>4</sup> *Exposure Biology Laboratory, Lautenberg Environmental Health Sciences Laboratory, Department of Preventive Medicine, Icahn School of Medicine at Mount Sinai, New York, 10029, New York, United States of America.*

<sup>5</sup> *Centre for Star and Planet Formation, Geological Museum, University of Copenhagen, Øster Voldgade 5-7, DK-1350 Copenhagen, Denmark.*

<sup>†</sup> *Both authors contributed equally to this manuscript*

*Correspondence and requests for materials should be addressed to P.A.D. (email: philip.doble@uts.edu.au) or D.J.H (dominic.hare@uts.edu.au)*

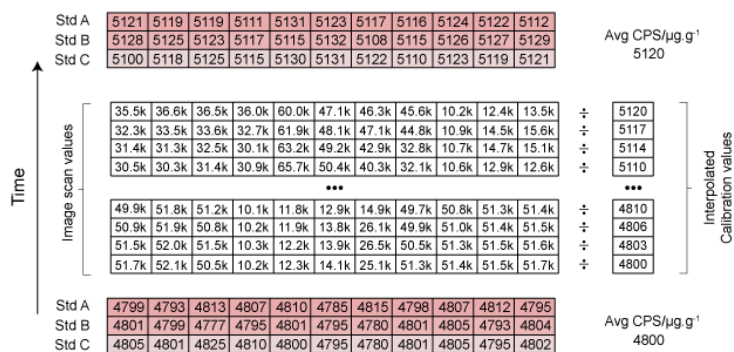

**Supplementary Figure 1:** Schematic of row-by-row interpolation of calibration factors (as  $\text{CPS}/\mu\text{g.g}^{-1}$ ) and division of row values by each row's interpolated factor. In this process, the average  $\text{CPS}/\mu\text{g.g}^{-1}$  for each in-house standard is calculated for each batch of standards (i.e. before and after each image). This average calibration value is interpolated to have the same number of points as there are rows in the image, and the values in each row are then divided by this interpolated value.

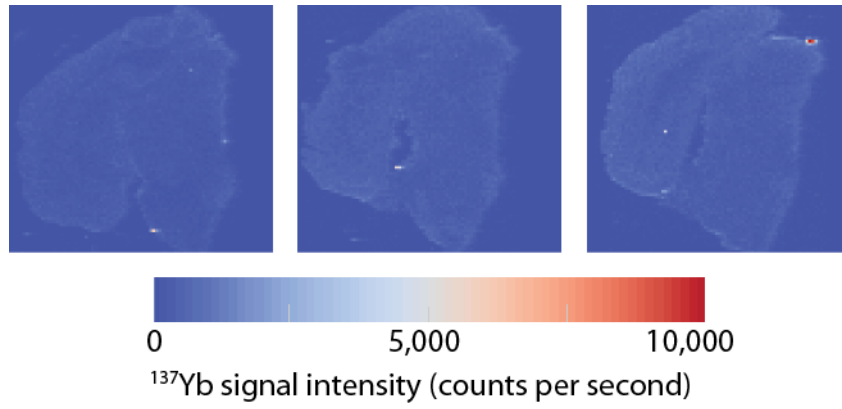

**Supplementary Figure 2:** Three replicate images of sections incubated with sheep IgG isotype controls labeled with Yb-173.

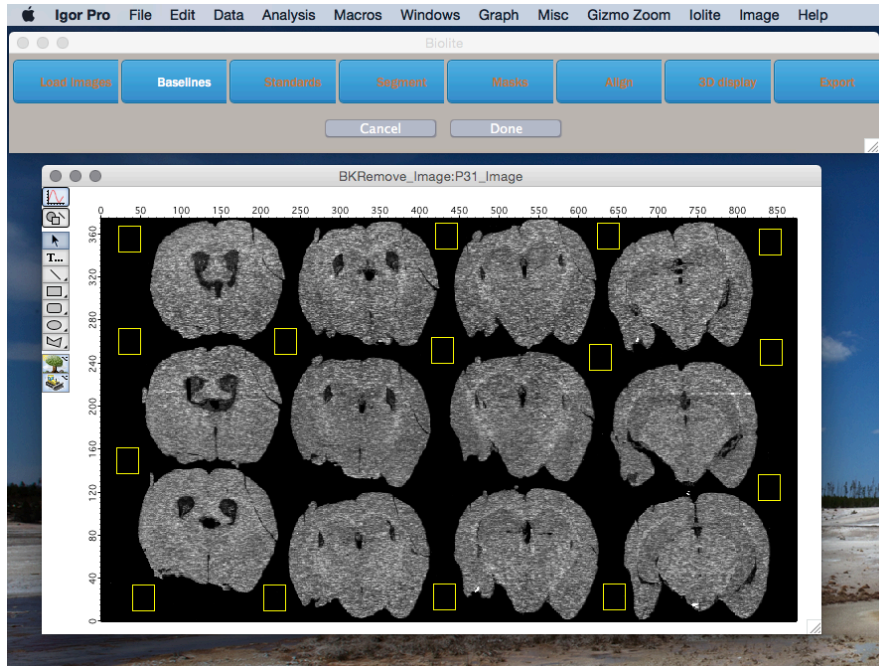

**Supplementary Figure 3:** Manual selection of background regions for surface interpolation.

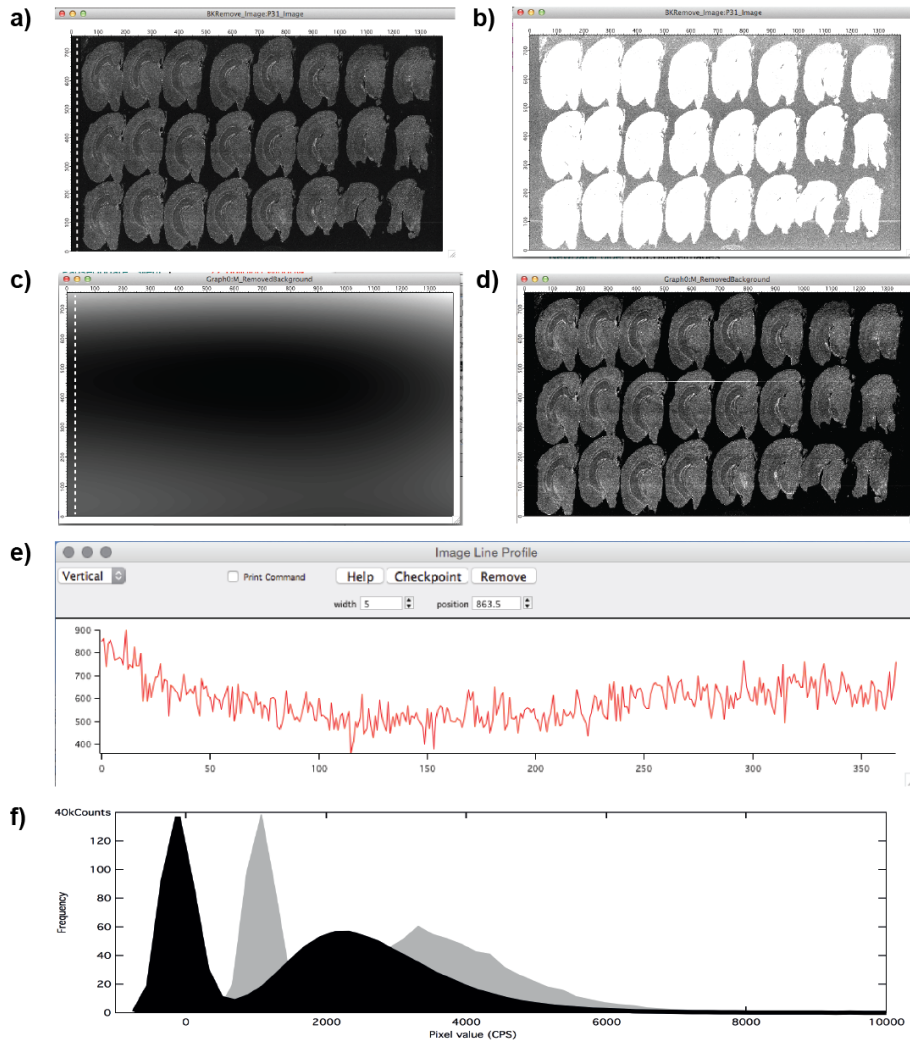

**Supplementary Figure 4:** Figure 4(a) shows the raw P31 channel image, before baseline correction. This same image is shown again in 4(b), but with the color-scale adjusted to show the backgrounds more clearly. From this image, it can be seen that the backgrounds are slightly higher (lighter grey) at the top and bottom of the image, compared to the backgrounds at the center (slightly darker grey). Figure 4(c) shows the result of interpolating between a series of areas selected as backgrounds to produce an estimate of the background variation. This image is subtracted on a pixel-by-pixel basis from (a) to produce the baseline-corrected image, (d). This approach corrects for the non-linear signal drift occurring over long instrument runtimes (in this case, the y-axis of the image; e), removing background signal whilst maintaining the distribution of pixels (f).

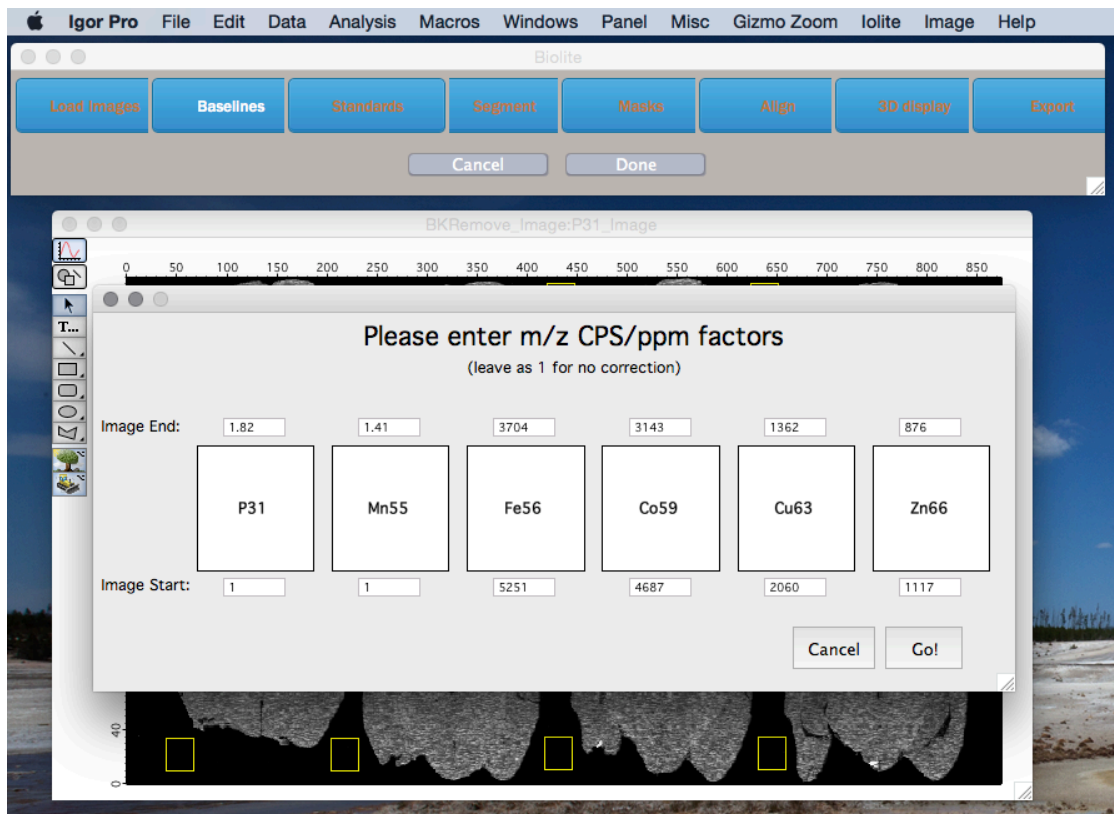

**Supplementary Figure 5:** Correction factor entry for each measured mass.

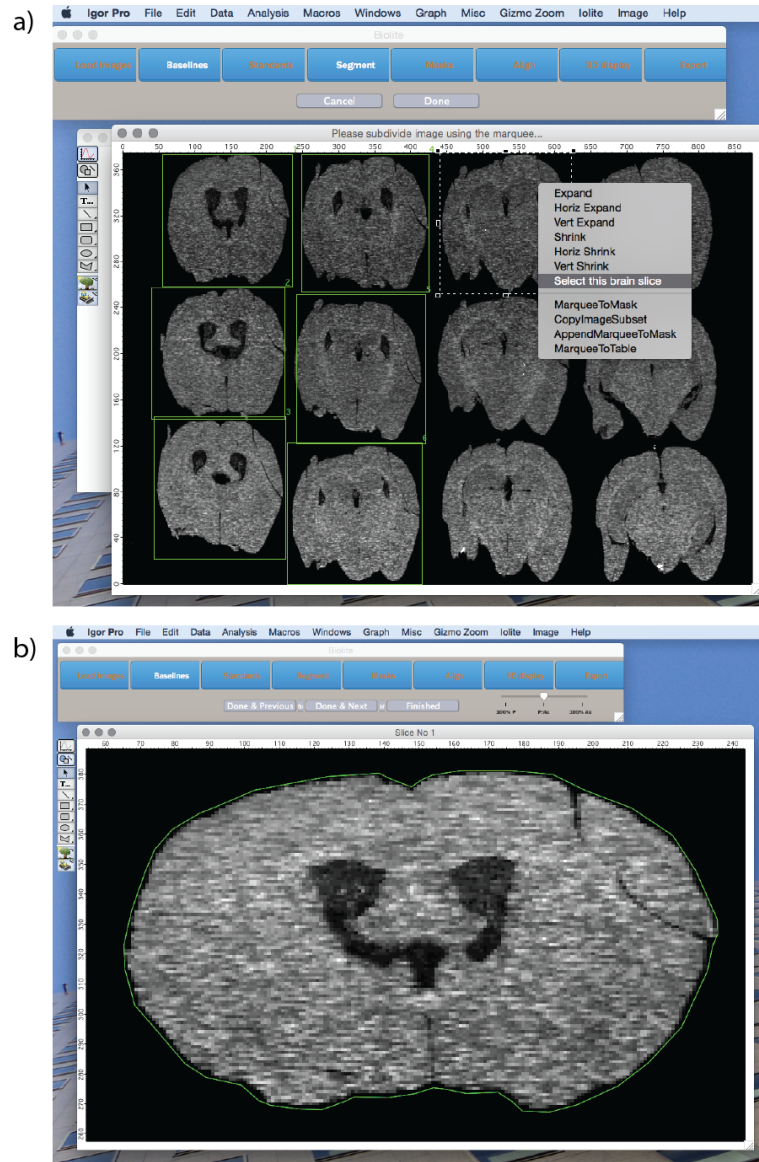

**Supplementary Figure 6:** a) Example of subdivision and slice ordering (1-12). b) Manual masking of tissue boundary.

**Supplementary Table 1:** Quantitative reproducibility for imaging experiments performed over an 18-day period, consisting of  $n = 32$  measurements.

|                                                                         | <b>Fe</b>  | <b>Cu</b>  | <b>Zn</b>  |
|-------------------------------------------------------------------------|------------|------------|------------|
| <b>Average measured concentration (<math>\mu\text{g g}^{-1}</math>)</b> | 44         | 24         | 32         |
| <b>Standard deviation</b>                                               | 4.5        | 3.0        | 3.5        |
| <b>%RSD</b>                                                             | 11         | 12         | 10         |
| <b>Actual concentration (<math>\mu\text{g g}^{-1}</math>)</b>           | $48 \pm 1$ | $24 \pm 3$ | $28 \pm 2$ |
| <b>% accuracy</b>                                                       | -8         | -2         | 15         |



**Supplementary Table 2:** Average values (cps;  $\mu\text{g g}^{-1}$  in italics) and 2 standard deviations for each cluster shown in **Fig. 4**. n/a = measured mass not used in clustering.

| Bregma $\pm$ (mm) | Cluster | <sup>31</sup> P |        | <sup>56</sup> Fe |               | <sup>63</sup> Cu |          | <sup>66</sup> Zn |        |
|-------------------|---------|-----------------|--------|------------------|---------------|------------------|----------|------------------|--------|
|                   |         | Average         | 2 SD   | Average          | 2 SD          | Average          | 2 SD     | Average          | 2 SD   |
| + 4.27            | 1       | 10474           | 20924  | <i>2.7141</i>    | <i>5.9594</i> | n/a              | n/a      | n/a              | n/a    |
|                   | 2       | 151460          | 18914  | <i>23.088</i>    | <i>9.8177</i> | n/a              | n/a      | n/a              | n/a    |
|                   | 3       | 85799           | 14948  | <i>18.957</i>    | <i>12.101</i> | n/a              | n/a      | n/a              | n/a    |
|                   | 4       | 111120          | 14320  | <i>23.598</i>    | <i>11.319</i> | n/a              | n/a      | n/a              | n/a    |
| - 1.16            | 1       | 15522           | 21474  | 7451.9           | 19258         | 6745.4           | 22429    | 2623.2           | 7681   |
|                   | 2       | 104820          | 20895  | 61193            | 30836         | 6171.8           | 25592    | 4318.2           | 6123.2 |
|                   | 3       | 92176           | 11574  | 37613            | 8519.8        | 783.16           | 5136.4   | 3225.1           | 2405.6 |
|                   | 4       | 110470          | 13464  | 25890            | 10785         | 1091.9           | 5139.1   | 2915.8           | 1662.2 |
|                   | 5       | 75700           | 11576  | 17932            | 10397         | 942.26           | 6653.9   | 2838.2           | 1974.6 |
|                   | 6       | 92368           | 8161.6 | 19721            | 7790.6        | 629.25           | 4714.2   | 3069.4           | 1787.4 |
| - 3.58            | 1       | n/a             | n/a    | 260080           | 360390        | 4.90E+06         | 2.77E+06 | 7514.8           | 8105.7 |
|                   | 2       | n/a             | n/a    | 101740           | 117150        | 1.28E+06         | 628390   | 3008.4           | 926.91 |
|                   | 3       | n/a             | n/a    | 98434            | 69260         | 5911.8           | 19904    | 2942.5           | 2479.5 |
|                   | 4       | n/a             | n/a    | 36565            | 14223         | 2103.6           | 9368.9   | 2355.3           | 1767   |
|                   | 5       | n/a             | n/a    | 19221            | 6772.1        | 989.83           | 6086.6   | 2096.7           | 1666.6 |
|                   | 6       | n/a             | n/a    | 7028             | 7207.7        | -296.12          | 3159     | 1598.9           | 1610.9 |
| - 6.36            | 1       | 93308           | 40565  | 113090           | 95076         | 94514            | 150000   | 17711            | 30643  |
|                   | 2       | 104920          | 26338  | 63350            | 26589         | 11360            | 16602    | 2098.6           | 6687.3 |
|                   | 3       | 6106.8          | 15100  | -862.95          | 12225         | 4750.6           | 18116    | -2912.3          | 5304.7 |
|                   | 4       | 95549           | 9788.1 | 32485            | 15468         | 5807.2           | 14140    | -243.65          | 3432.6 |
|                   | 5       | 76434           | 16810  | 25031            | 16975         | 4499.8           | 11912    | -676.16          | 3504.8 |
|                   | 6       | 118630          | 21679  | 22169            | 14942         | 2606.1           | 7671.4   | -383.66          | 3396.8 |

**Supplementary Movie Legends:**

**Supplementary Movie S1:** Manipulation of multi-criteria voxelgrams to delineate the hippocampal formation (HIF)

**Supplementary Movie S2:** Three-dimensional volume reconstruction of high Zn and Fe concentrations in the mouse midbrain. Data reconstructed using ParaView.

**Supplementary Movie S3:** Three-dimensional volume reconstructions of tyrosine hydroxylase distribution (as  $^{173}\text{Yb}$  and a proxy for dopamine) and Fe identifies areas where high Fe and dopamine colocalize.
